# Supplementary material for: Bacteriophages lytic for Salmonella rapidly reduce Salmonella contamination on glass and stainless steel surfaces
Source: PubMed Central journal article supplement — Bacteriophage. 2013 Jul 26;3(3):e25697. doi: 10.4161/bact.25697 (PMC3821689; doi:10.4161/bact.25697), 2013-07-26
Supplement: bact-3-e25697-s01.pdf [file bact-3-e25697-s01.pdf]

## **Supplemental Material to:**

**Joelle Woolston, Adam R. Parks, Tamar Abuladze,  
Bradley Anderson, Manrong Li, Chandi Carter, Leigh Farris  
Hanna, Serena Heyse, Duane Charbonneau,  
Alexander Sulakvelidze**

**Bacteriophages lytic for *Salmonella* rapidly  
reduce *Salmonella* contamination on glass and stainless  
steel surfaces**

**Bacteriophage 2013; 3(3)**

**<http://dx.doi.org/10.4161/bact.25697>**

**<http://www.landesbioscience.com/journals/mge/article/25697/>**

- 1 Supplemental Table 1 A selection of serotypes from Intralytix's collection and the percent kill of  
 2 each by SalmoFresh™ at the standard working solution concentration (1x10<sup>9</sup> PFU/mL).

| Serotype*      | # strains in collection | % lysed by SalmoFresh™ |
|----------------|-------------------------|------------------------|
| Typhimurium    | 182                     | 100%                   |
| Enteritidis    | 136                     | 100%                   |
| Hadar          | 115                     | 99%                    |
| Heidelberg     | 40                      | 100%                   |
| Newport        | 27                      | 100%                   |
| Kentucky       | 25                      | 100%                   |
| Georgia        | 19                      | 89%                    |
| Agona          | 11                      | 100%                   |
| Grampian       | 8                       | 100%                   |
| Senftenberg    | 8                       | 100%                   |
| Alachua        | 5                       | 80%                    |
| Infantis       | 5                       | 100%                   |
| Reading        | 5                       | 100%                   |
| Schwarzengrund | 5                       | 80%                    |
| Thompson       | 5                       | 100%                   |
| All strains    | 916                     | 95%                    |

3 \*Serotypes listed are those represented by ≥ 5 strains in Intralytix's collection
